# Supplementary material for: Diel Variation of Biogenic Volatile Organic Compound Emissions- A field Study in the Sub, Low and High Arctic on the Effect of Temperature and Light
Source: PLOS journal article supplement (doi:10.1371/journal.pone.0123610), 2015-04-21
Supplement: S3 (10.1371/journal.pone.0123610.s003) [file journal.pone.0123610.s003]

**Table S3. The mean coverage (SE) of plant species in in the subarctic site, Sodankylä Northern Finland, mid-July 2008.** Vegetation coverage was analyzed using the point-intercept method (n=4).

| Vegetation type  | Plant species                 | Percentage cover     |
|------------------|-------------------------------|----------------------|
| Evergreen shrubs |                               |                      |
|                  | <i>Vaccinium oxycoccos</i>    | 5.8 (-) <sup>a</sup> |
|                  | <i>Andromeda polifolia</i>    | 7.4 (-) <sup>a</sup> |
| Graminoids       |                               |                      |
|                  | <i>Carex limosa</i>           | 6.8 (2.2)            |
|                  | <i>Eriophorum russeolum</i>   | 68.2 (6.4)           |
|                  | <i>Scheuchzeria palustris</i> | 3.3 (4.3)            |
| Forbs            |                               |                      |
|                  | <i>Menyanthes trifoliata</i>  | 2.5 (-) <sup>a</sup> |
| Moss             |                               |                      |
|                  | <i>Warnstorfia exannulata</i> | 55.4 (24.0)          |
| Dead material    |                               |                      |
|                  | Mud bottom                    | 35.0 (8.9)           |

<sup>a</sup> (-) the species was found in only one plot.
